# Supplementary material
Source: PubMed Central journal article supplement (PMC8514084)
Supplement: NIHMS1743625-supplement-1.pdf [file NIHMS1743625-supplement-1.pdf]

## SUPPLEMENTARY ONLINE DATA

# A regulating role of the JAK2 FERM domain in hyperactivation of JAK2(V617F)

Lequn ZHAO, Yue MA, Joachim SEEMANN and Lily Jun-shen HUANG<sup>1</sup>

Department of Cell Biology, University of Texas Southwestern Medical Center at Dallas, Dallas, TX 75390, U.S.A.

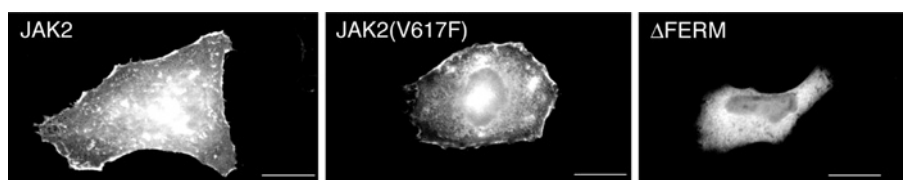

**Figure S1 Cellular localization of GFP-JAK2, GFP-JAK2(V617F) and GFP- $\Delta$ FERM**

Cellular localization of JAK2, JAK2(V617F) or  $\Delta$ FERM were examined as GFP-fusion proteins in HeLa cells. Cells on coverslips were fixed with 3.7 % formaldehyde in PBS for 15 min and mounted in Mowiol mounting medium (Calbiochem). Fluorescent images were taken on an Axiovert 200M microscope with a Plan Neofluar 40 $\times$ /1.3 DIC (differential interference contrast) objective (Carl Zeiss), an Orca-285 camera (Hamamatsu Photonics) and the software package Openlab (4.02; Improvision). Images were analysed with Adobe Photoshop. Representative cells are shown. Scale bar indicates 10  $\mu$ m.

Received 21 April 2009/17 November 2009; accepted 24 November 2009  
Published as BJ Immediate Publication 24 November 2009, doi:10.1042/BJ20090615

<sup>1</sup> To whom correspondence should be addressed (email Lily.Huang@utsouthwestern.edu).
